# Supplementary material for: Directional growth of nanotubes on micelles by soft-template electropolymerization with varying hydrophobicity and strong water adhesion
Source: Royal Society of Chemistry journal article supplement (doi:10.1039/d3nj01186k), 2023-01-01
Supplement: d3nj01186k1.pdf [file d3nj01186k1.pdf]

## Supporting Information

### **Directional growth of nanotube on micelles by soft-template electropolymerization with various hydrophobicity and strong water adhesion**

Diawo Diallo,<sup>a</sup> Abdoulaye Dramé,<sup>a</sup> Alioune Diouf,<sup>a</sup> Aboubacary Sene,<sup>a</sup> Frédéric Guittard,<sup>b</sup> & Thierry Darmanin<sup>b,\*</sup>

## Other studied monomers

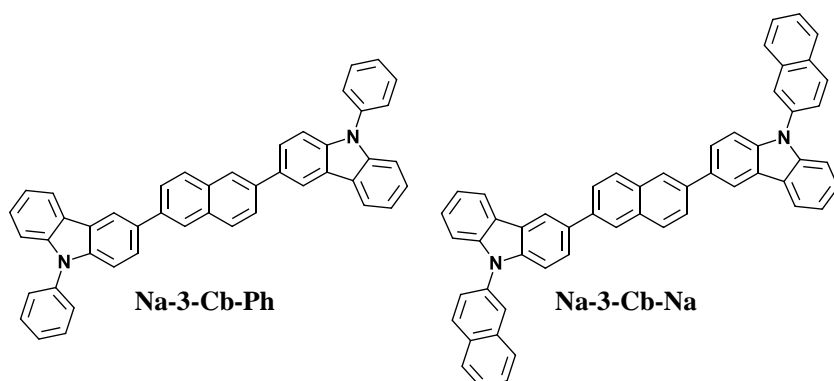

**2,6-Bis(9-phenyl-9H-carbazol-3-yl)naphthalene (Na-3-Cb-Ph).** Yield 15%; Oil;  $^1\text{H NMR}$  (400 MHz,  $\text{CDCl}_3$ )  $\delta_{\text{H}}$ : 8.48 (d,  $J = 1.4$  Hz, 3H), 8.26 (d,  $J = 7.7$  Hz, 3H), 7.79 (dd,  $J = 8.5, 1.8$  Hz, 3H), 7.65 (m, 12H), 7.50 (m, 13H), 7.33 (m, 3H);  $^{13}\text{C NMR}$  (101 MHz,  $\text{CDCl}_3$ )  $\delta_{\text{C}}$ : 141.36, 140.04, 137.79, 134.36, 130.01, 127.43, 127.08, 126.04, 125.83, 123.97, 123.57, 120.41, 119.97, 118.88, 109.94.

**2,6-Bis(9-(naphthalen-2-yl)-9H-carbazol-3-yl)naphthalene (Na-3-Cb-Na).** Yield 8%; Oil;  $^1\text{H NMR}$  (400 MHz,  $\text{CDCl}_3$ )  $\delta_{\text{H}}$ : 8.39 (d,  $J = 1.6$  Hz, 2H), 8.22 (d,  $J = 7.7$  Hz, 2H), 8.09 (d,  $J = 9.1$  Hz, 4H), 7.99 (dd,  $J = 6.1$  Hz, 3.4 Hz, 2H), 7.93 (dd,  $J = 6.1$  Hz, 3.4 Hz, 2H), 7.74 (dd,  $J = 8.2, 1.0$  Hz, 4H), 7.69 (m, 4H), 7.60 (dd,  $J = 6.2, 3.3$  Hz, 4H), 7.50 (dd,  $J = 15.7, 8.2$  Hz, 8H), 7.40 (m, 2H), 7.35 (dd,  $J = 16.1, 7.2$  Hz, 4H).  $^{13}\text{C NMR}$  (101 MHz,  $\text{CDCl}_3$ )  $\delta_{\text{H}}$ : 141.99, 141.52, 140.54, 135.12, 134.02, 133.61, 132.44, 129.91, 129.28 – 129.08, 128.78, 127.91, 127.34, 126.89, 126.55, 126.19, 125.55, 125.26, 124.29, 123.98, 123.58, 120.41, 120.18, 118.87, 110.00.

## NMR spectra

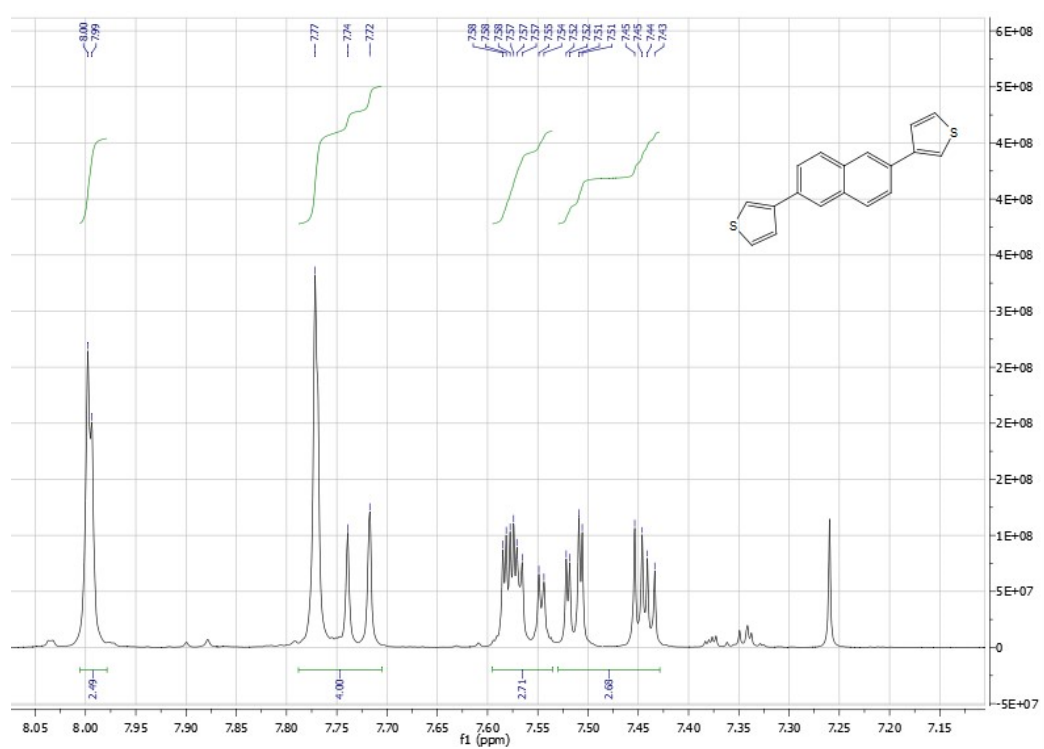

Figure S1.  $^1\text{H}$  NMR of Na-3-Th.

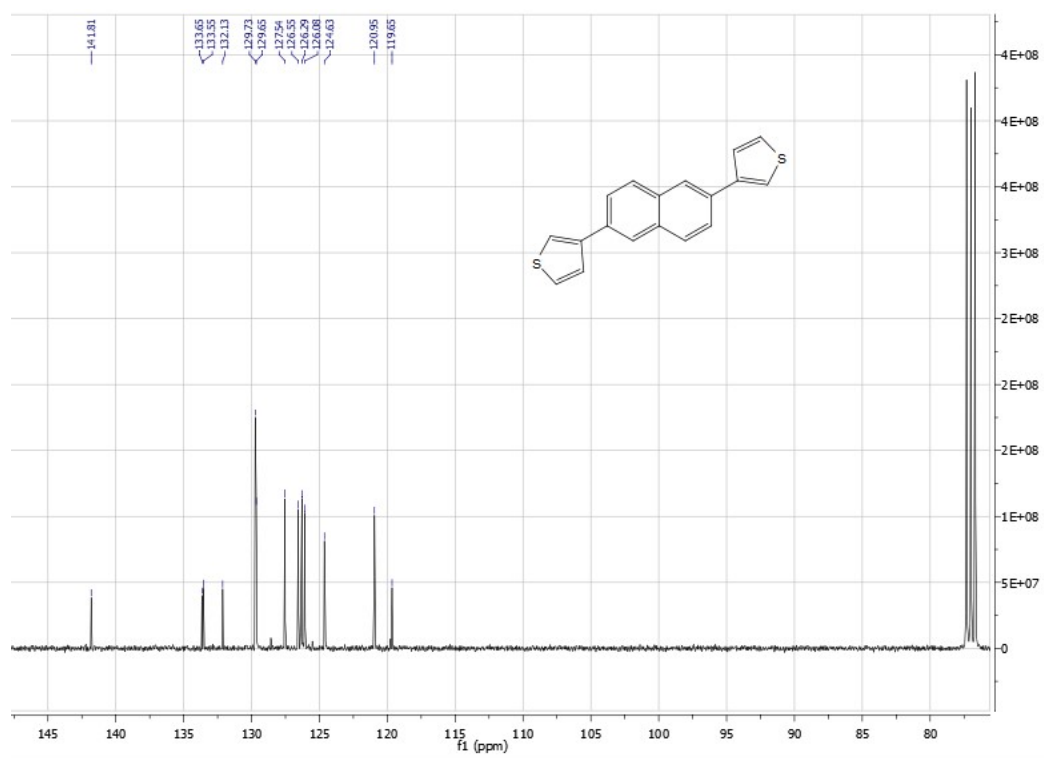

Figure S2.  $^{13}\text{C}$  NMR of Na-3-Th.

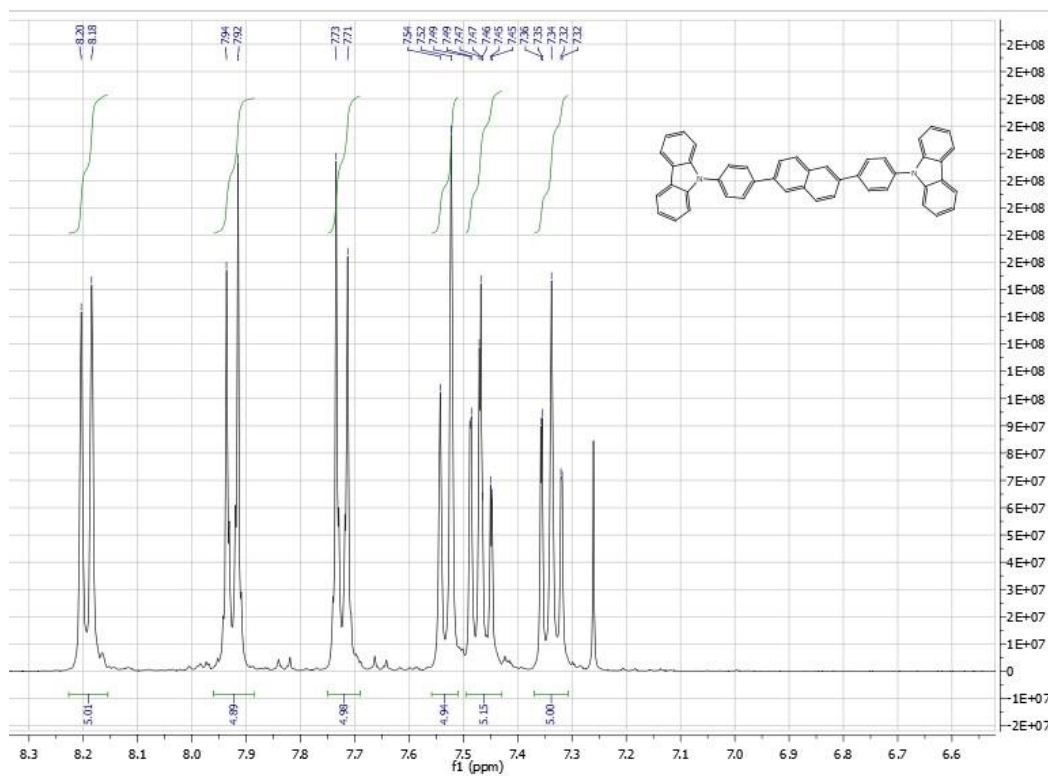

Figure S3.  $^1\text{H}$  NMR of Na-p-Cb.

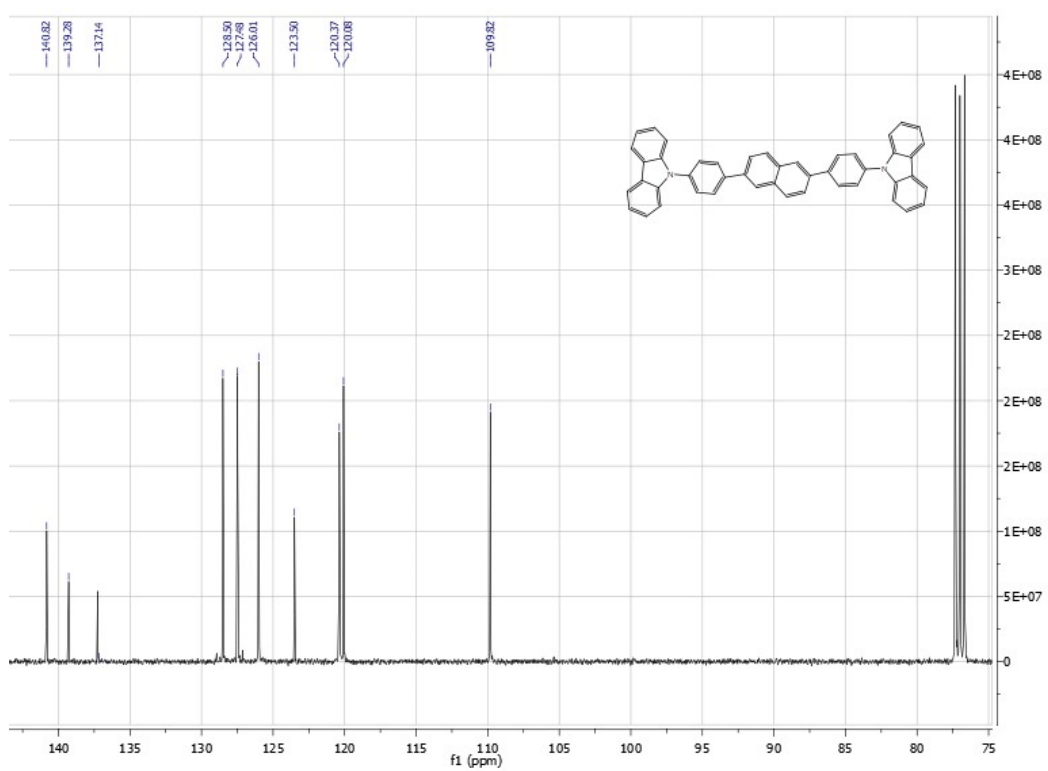

Figure S4.  $^{13}\text{C}$  NMR of Na-p-Cb.

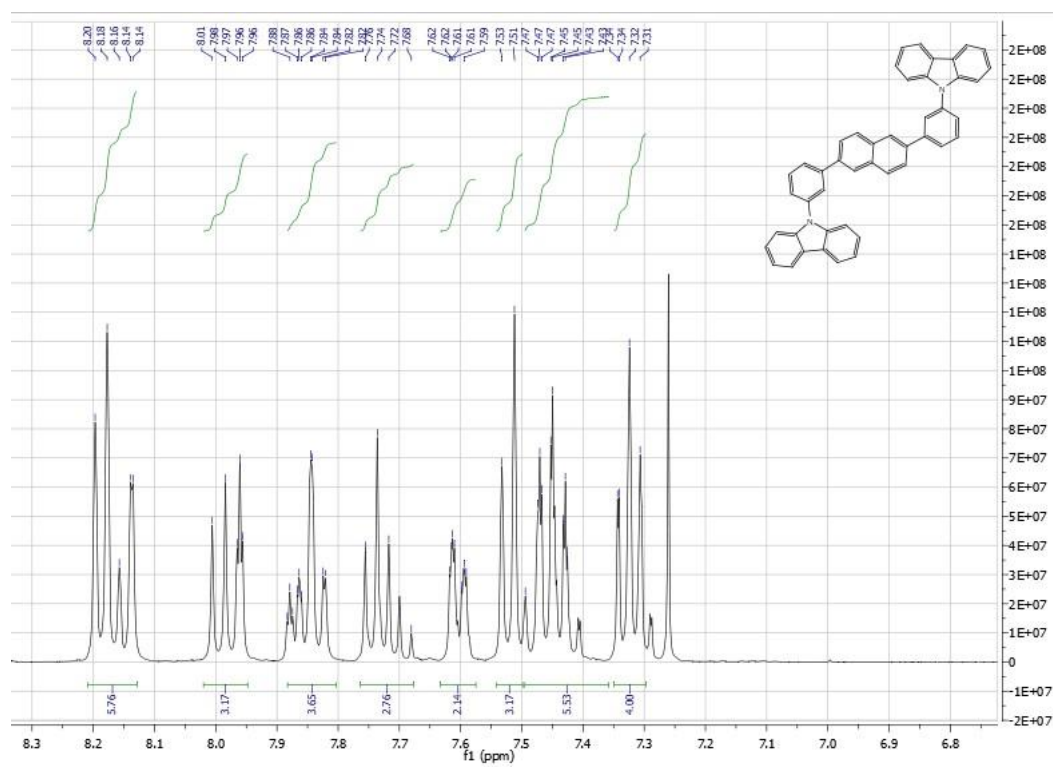

Figure S5. <sup>1</sup>H NMR of Na-m-Cb.

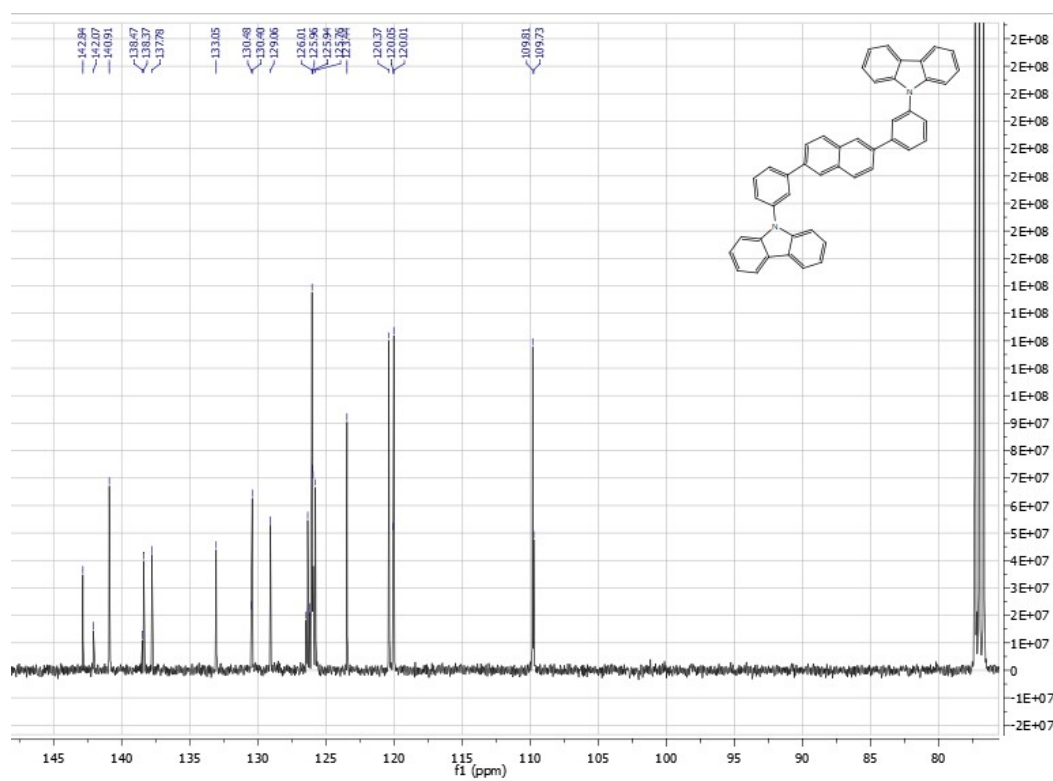

Figure S6. <sup>13</sup>C NMR of Na-m-Cb.

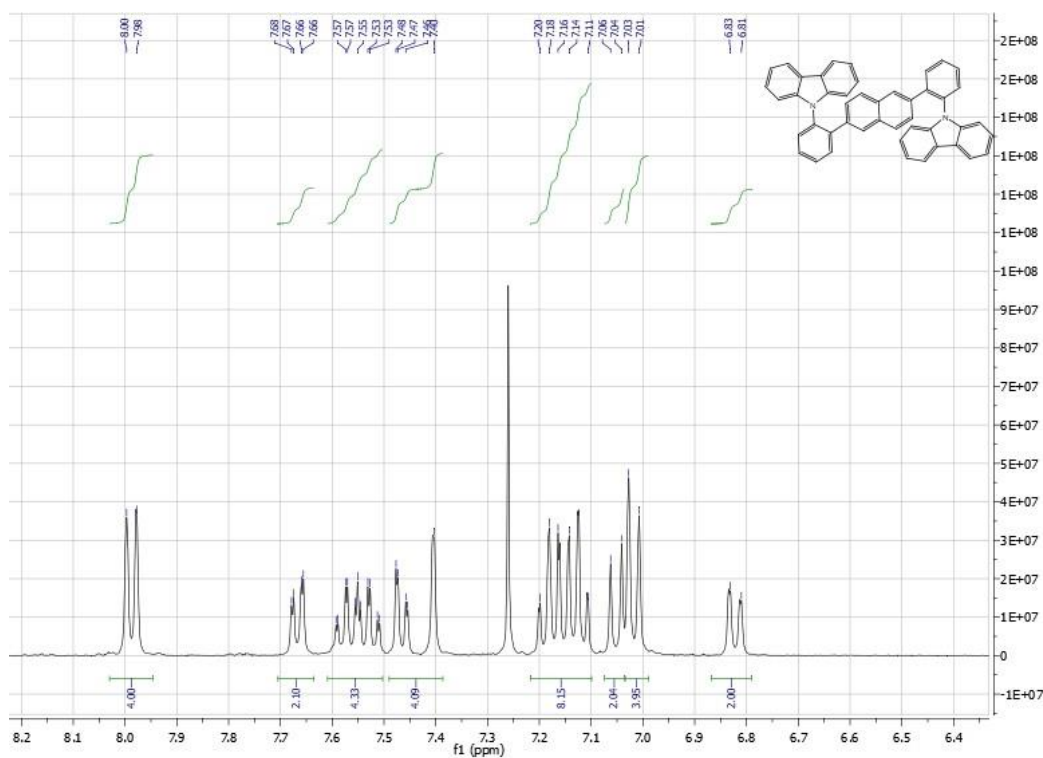

Figure S7.  $^1\text{H}$  NMR of Na-o-Cb.

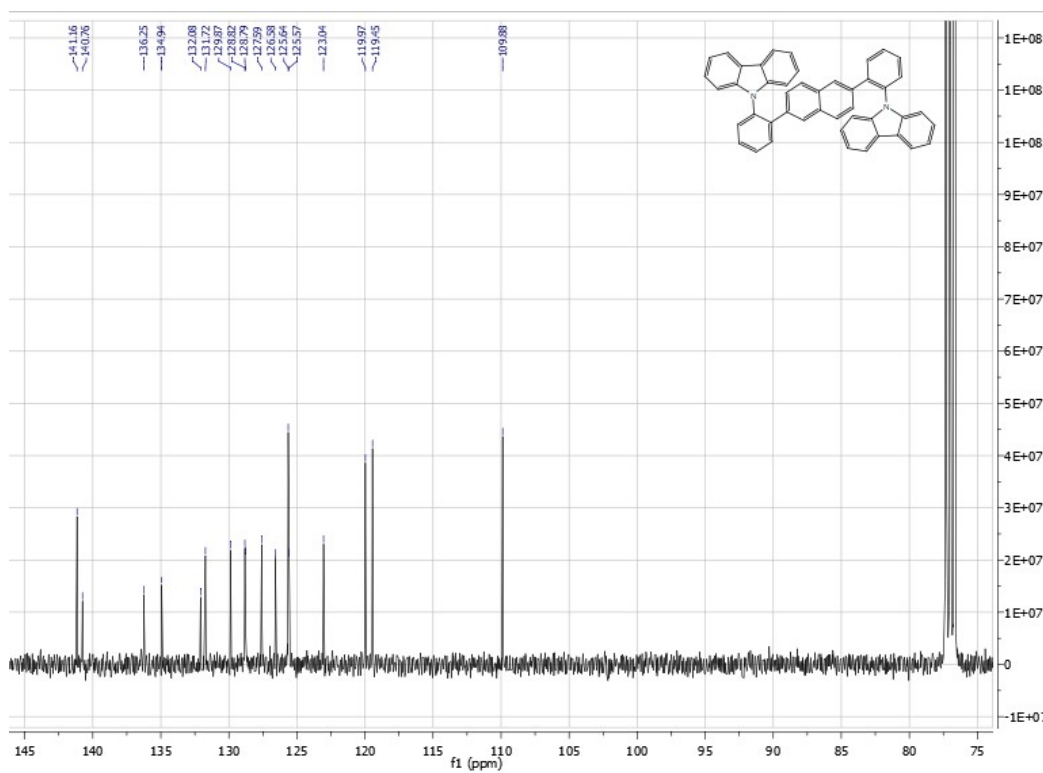

Figure S8.  $^{13}\text{C}$  NMR of Na-o-Cb.

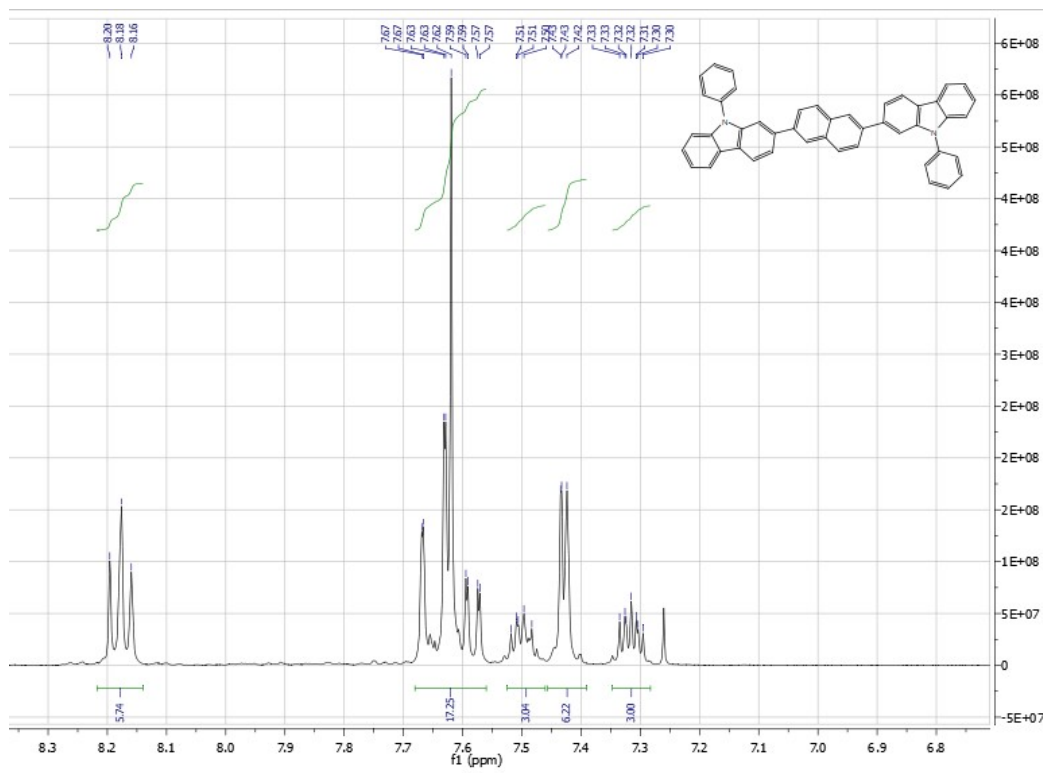

Figure S9.  $^1\text{H}$  NMR of Na-2-Cb-Ph.

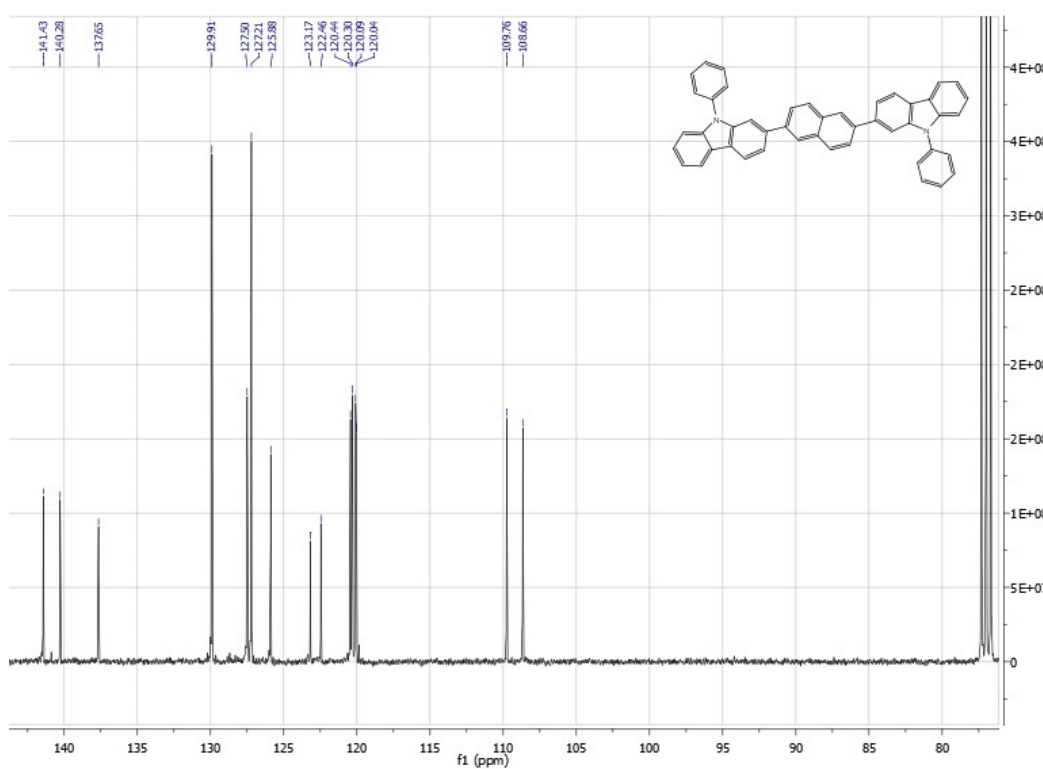

Figure S10.  $^{13}\text{C}$  NMR of Na-2-Cb-Ph.

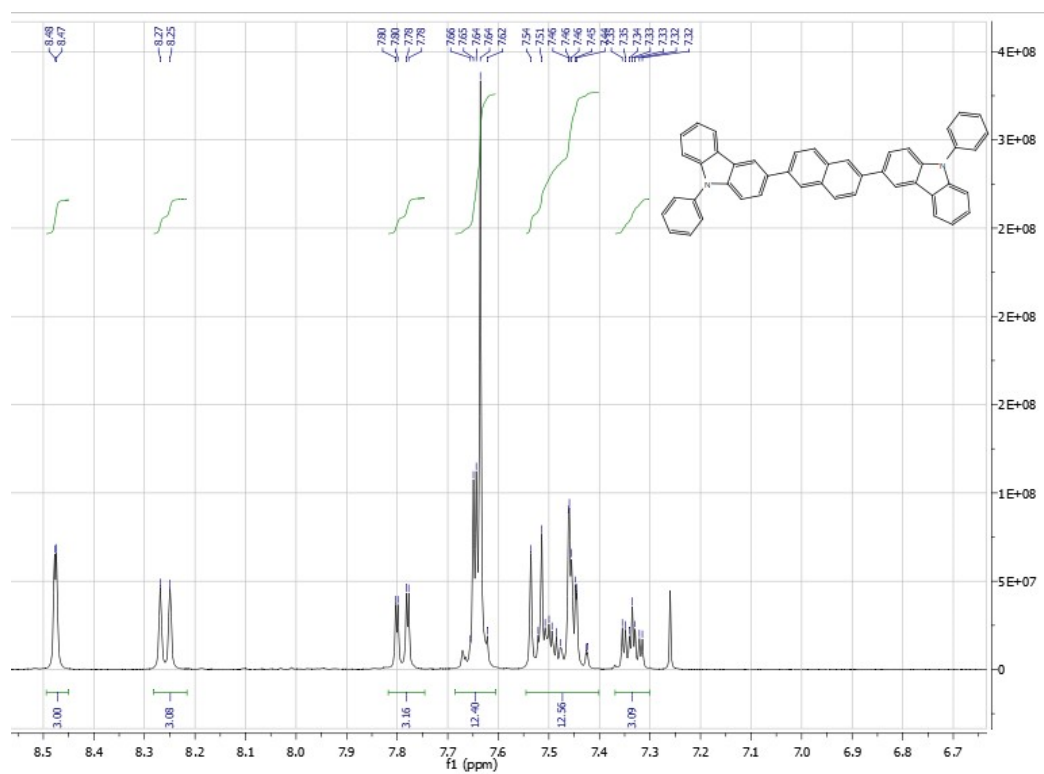

Figure S11.  $^1\text{H}$  NMR of Na-3-Cb-Ph.

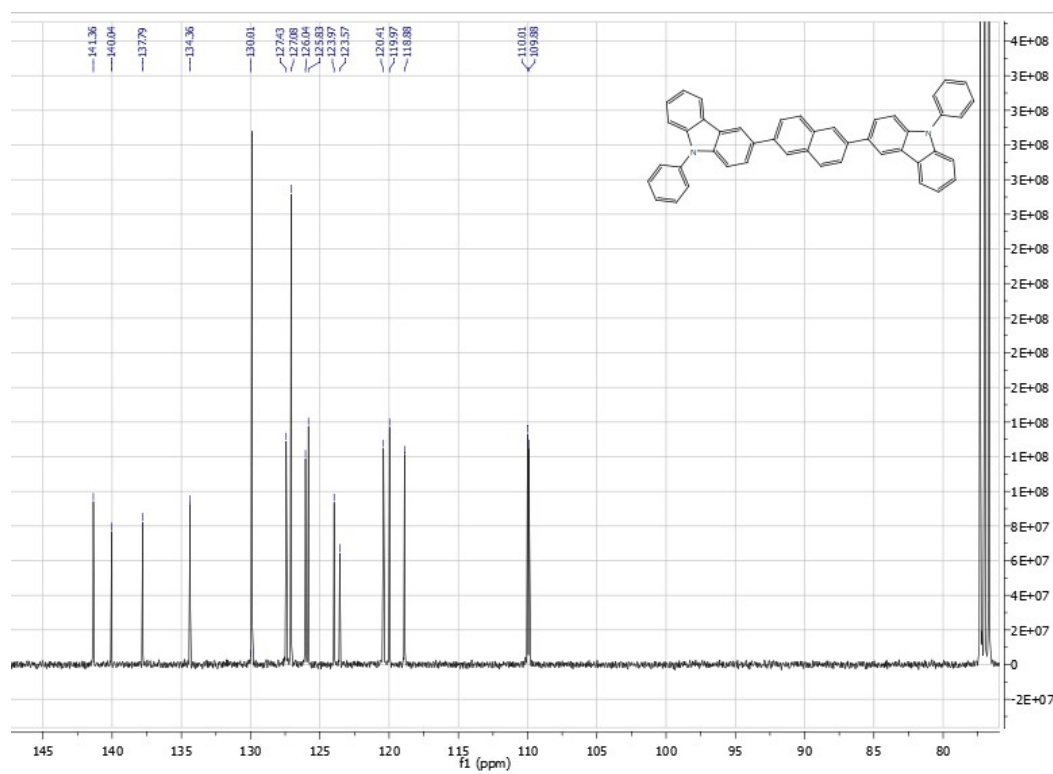

Figure S12.  $^{13}\text{C}$  NMR of Na-3-Cb-Ph.



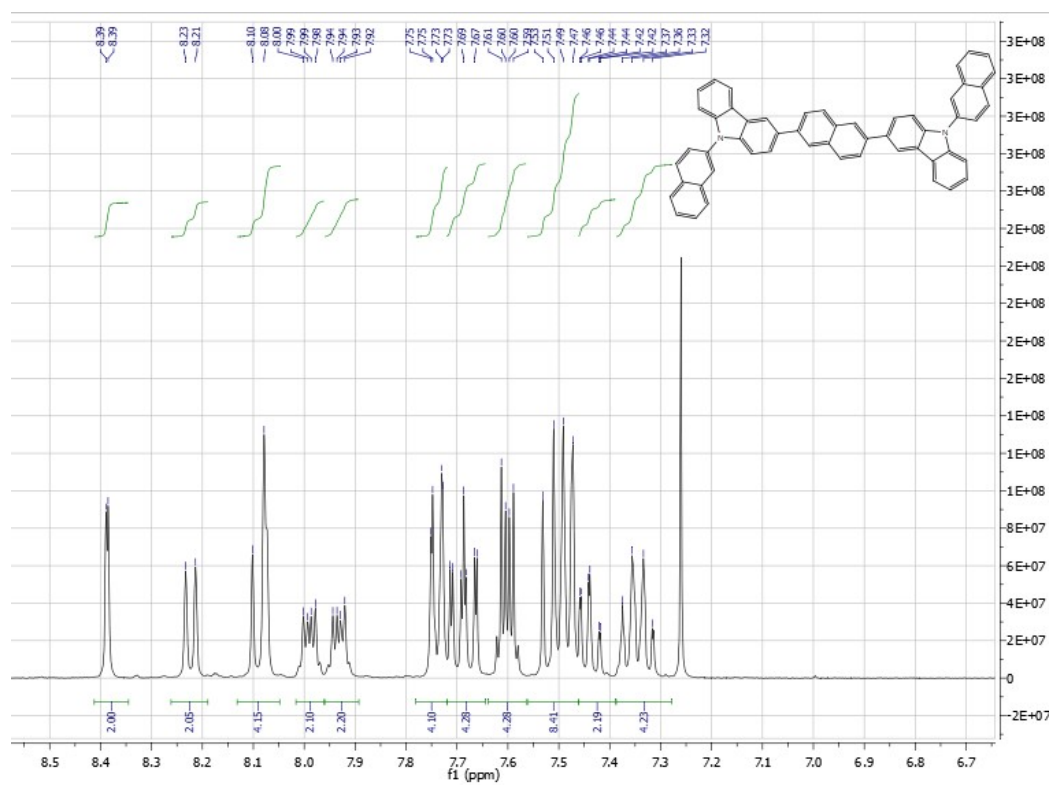

Figure S13.  $^1\text{H}$  NMR of Na-3-Cb-Na.

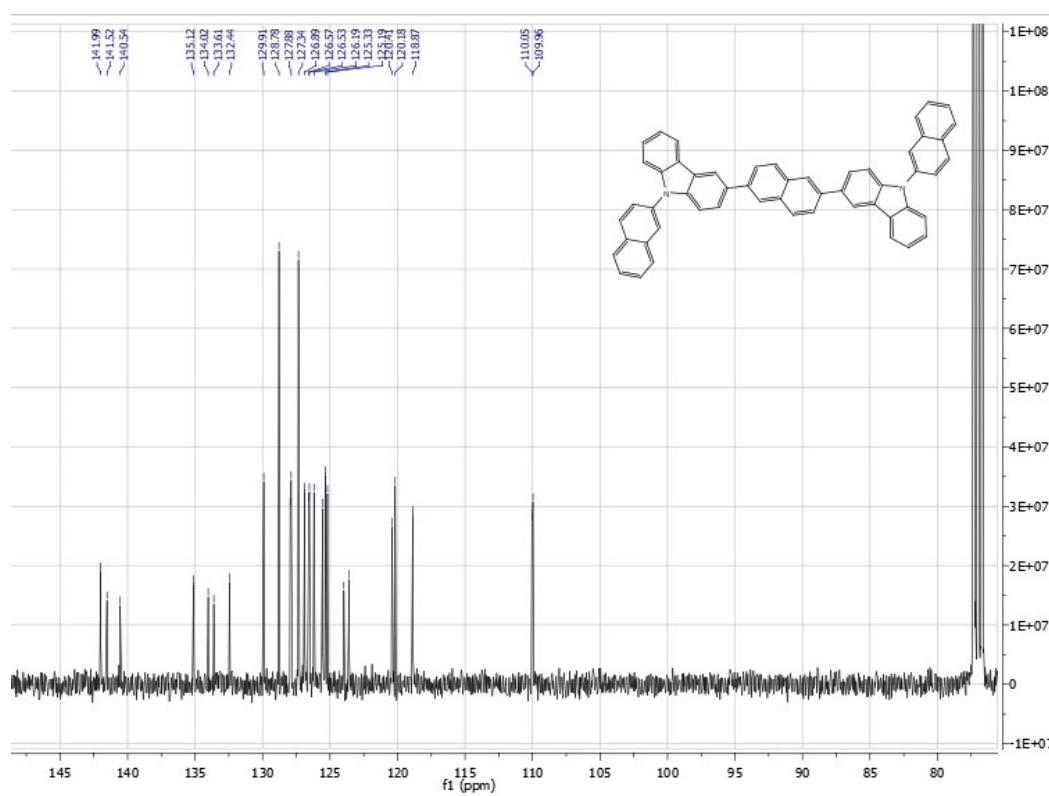

Figure S14.  $^{13}\text{C}$  NMR of Na-3-Cb-Na.
